# Supplementary material for: Regulation by S-nitrosylation of the Calvin-Benson cycle fructose-1,6-bisphosphatase in Pisum sativum
Source: PubMed Central journal article supplement — Redox Biol. 2017 Oct 12;14:409–16. doi: 10.1016/j.redox.2017.10.008 (PMC5651545; doi:10.1016/j.redox.2017.10.008), 2017-10-12
Supplement: mmc1.pdf [file mmc1.pdf]

# Supplemental figure 1

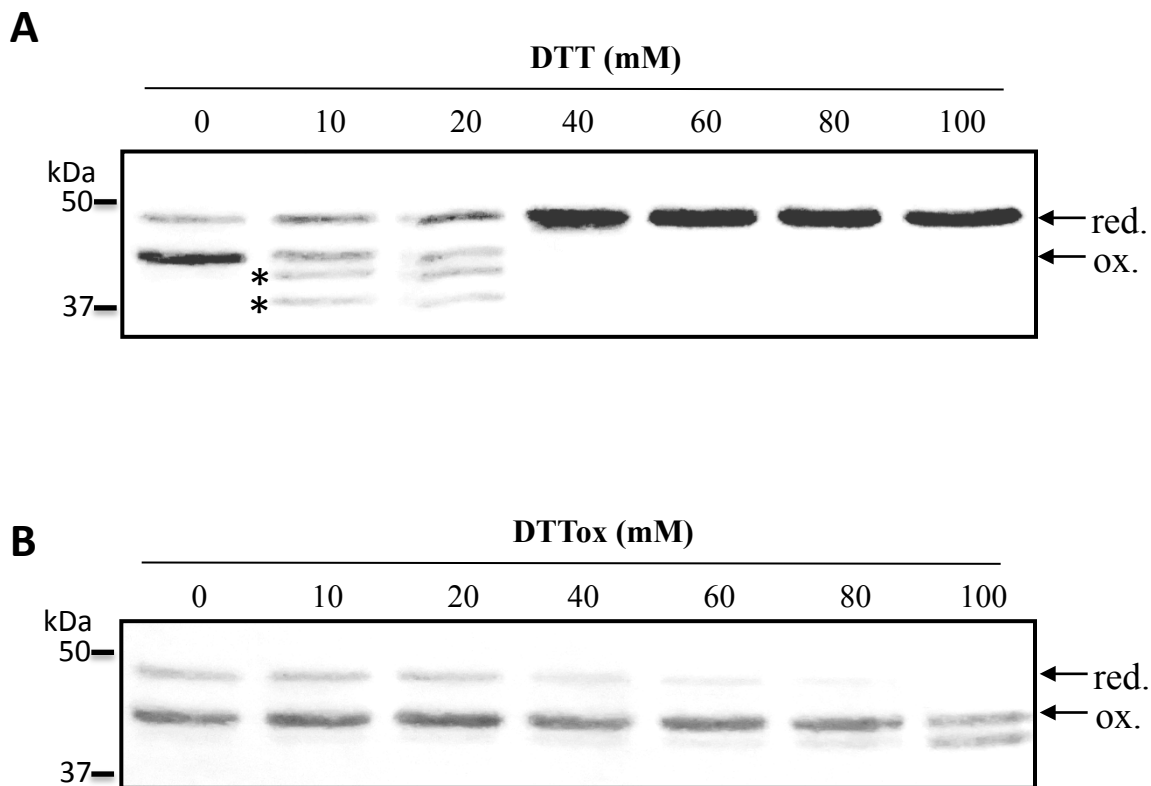

**Western blotting showing the *in vitro* redox pattern of cFBP1.** A, DTT concentration necessary to fully reduce cFBP1. Recombinant cFBP1 was incubated in a solution with 100 mM Tris-HCl (pH 8.0) and different concentrations of reduced DTT. After a 30 min incubation at room temperature free cysteines were blocked by adding 3 volumes of an alkylating solution containing 100 mM Tris-HCl (pH 8.0), 2.7% CHAPS, and 100 mM iodoacetamide and incubated at 37°C for 1 h. B, Oxidation pattern of cFBP1 by using oxidized DTT. cFBP1 was reduced as above mentioned and excess DTT removed by gel filtration. Then, this protein was incubated for 30 min at room temperature in a buffer containing 100 mM Tris-HCl (pH 8.0) with different concentrations of DTT oxidized. Finally, the protein was alkylated as previously described. 100 ng of cFBP1 were loaded per lane and detected with anti-FBPase antibodies.
