# Supplementary material for: Regulation by S-nitrosylation of the Calvin-Benson cycle fructose-1,6-bisphosphatase in Pisum sativum
Source: PubMed Central journal article supplement — Redox Biol. 2017 Oct 12;14:409–16. doi: 10.1016/j.redox.2017.10.008 (PMC5651545; doi:10.1016/j.redox.2017.10.008), 2017-10-12
Supplement: mmc2.pdf [file mmc2.pdf]

## Supplemental figure 2

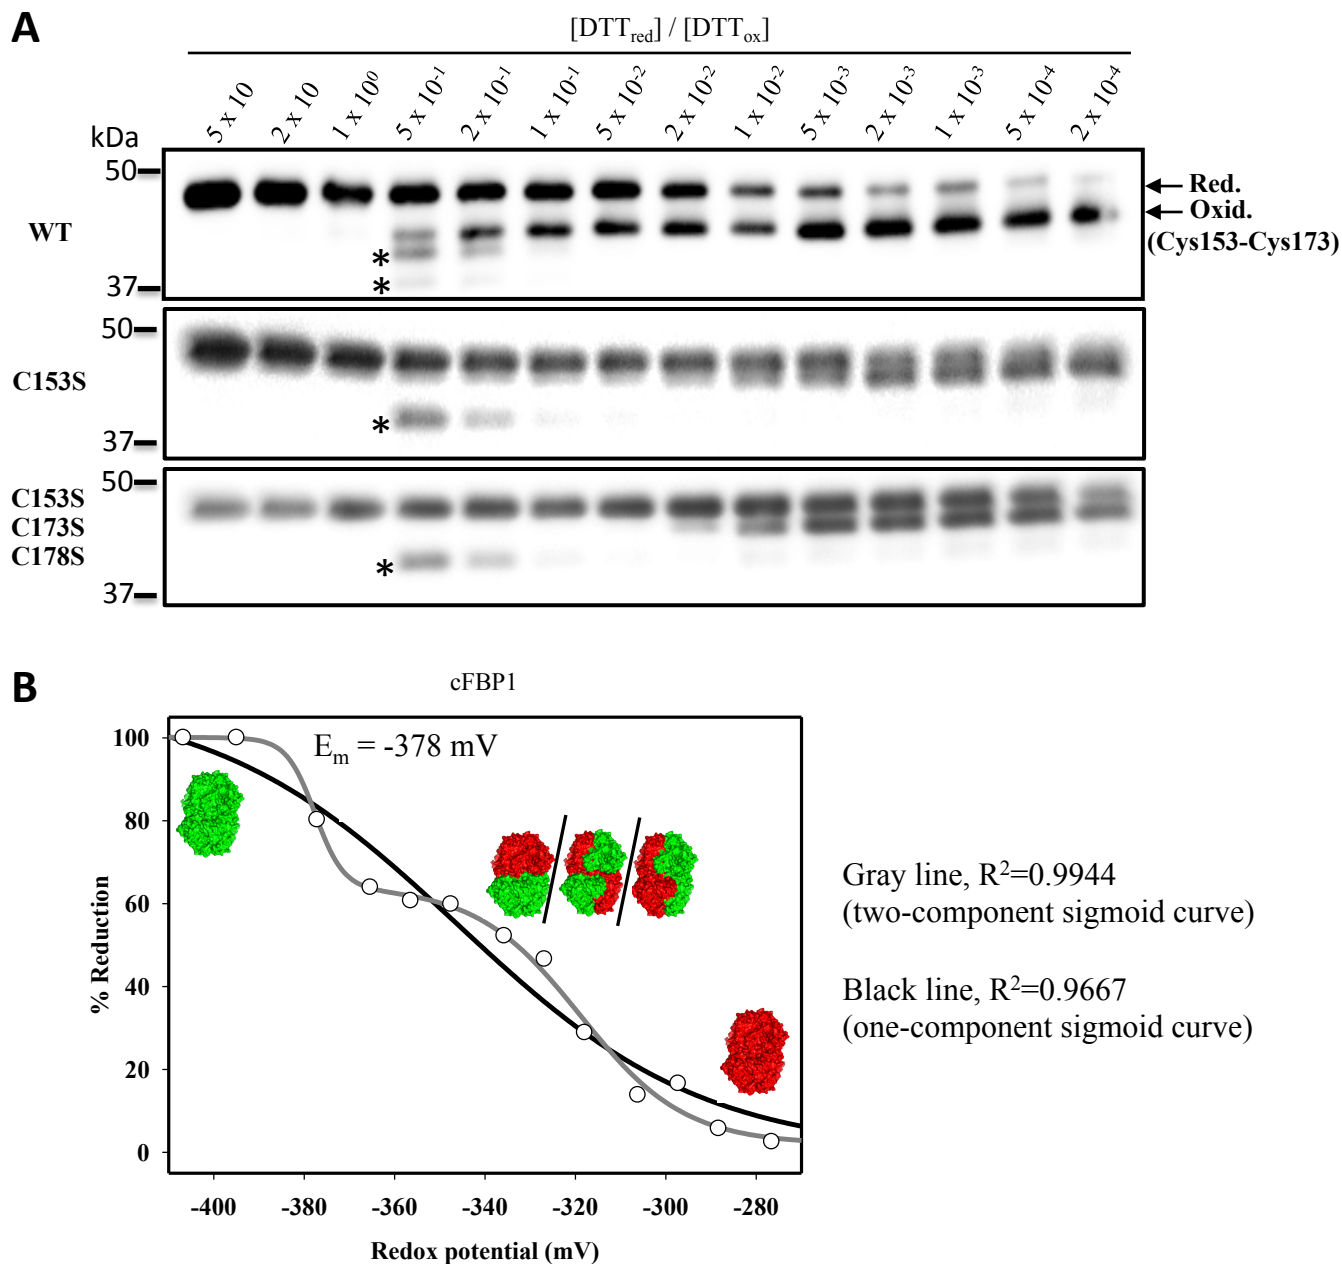

**Redox potential of the regulatory disulphide Cys153-Cys173.** A, western blot for the redox titration of the cFBP1 regulatory disulfide and redox pattern of the mutant C153S and triple mutant C153S C173S C178S. FBPase, at a final concentration of 100  $\mu\text{g/ml}$ , was incubated in 50  $\mu\text{l}$  of 100 mM Tris-HCl buffer (pH 8.0) that contained different DTT<sub>red</sub>/DTT<sub>ox</sub> ratios. Concentration of oxidized DTT was fixed at 50 mM and reduced DTT was adjusted to obtain the ratios displayed in the figure. After a 3 h incubation at room temperature, free cysteines were blocked as shown in supplemental figure 1. B, Titration curve representing the midpoint redox potentials of the disulphide bridge Cys153-Cys173. Values were obtained by quantification of the oxidized and reduced bands of the WT FBPase. For the calculation of the redox potentials the value of  $n$  in the Nerst equation was set at 2. Curves were fitted using SigmaPlot software.
