# Supplementary material for: Regulation by S-nitrosylation of the Calvin-Benson cycle fructose-1,6-bisphosphatase in Pisum sativum
Source: PubMed Central journal article supplement — Redox Biol. 2017 Oct 12;14:409–16. doi: 10.1016/j.redox.2017.10.008 (PMC5651545; doi:10.1016/j.redox.2017.10.008), 2017-10-12
Supplement: mmc3.pdf [file mmc3.pdf]

## Supplemental figure 3

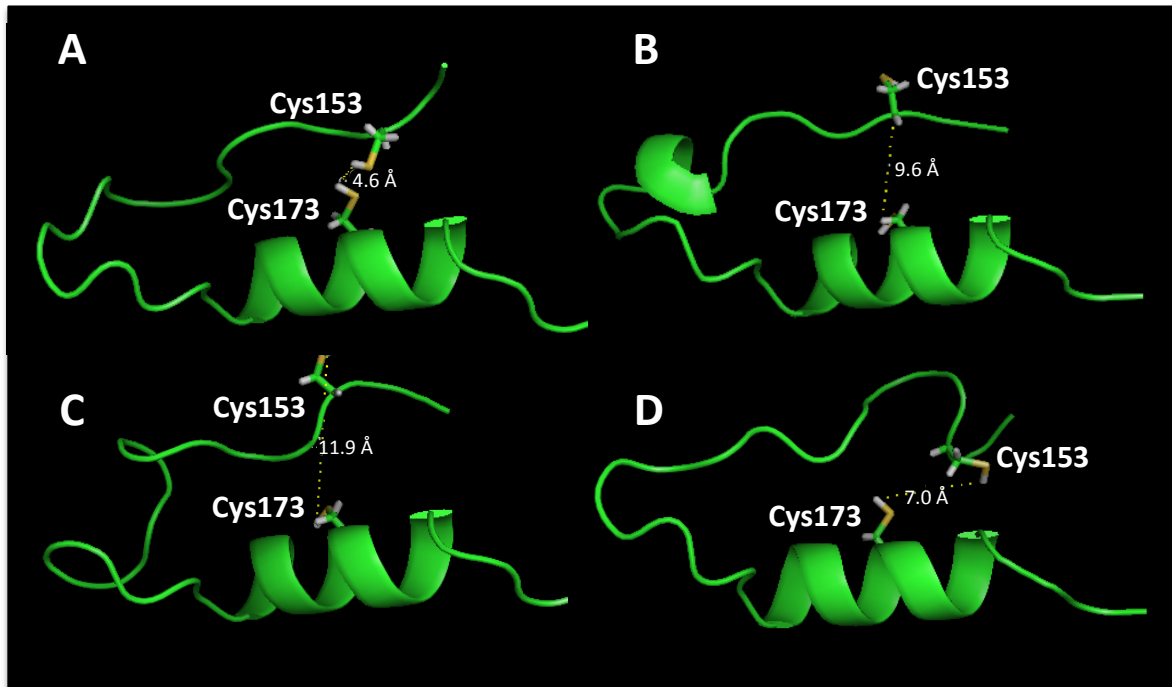

**Model of the tertiary structure of the 170's loop showing the distance between Cys153 and Cys173 in the different subunits.** The predicted structure was obtained with SWISS-MODEL (<https://swissmodel.expasy.org/>) by using as a template the modelled crystal structure 1DBZ of the C153S mutant of pea chloroplast FBPase. Images were generated with PyMOL.
