# Supplementary material for: Regulation by S-nitrosylation of the Calvin-Benson cycle fructose-1,6-bisphosphatase in Pisum sativum
Source: PubMed Central journal article supplement — Redox Biol. 2017 Oct 12;14:409–16. doi: 10.1016/j.redox.2017.10.008 (PMC5651545; doi:10.1016/j.redox.2017.10.008), 2017-10-12
Supplement: mmc4.pdf [file mmc4.pdf]

## Supplemental figure 4

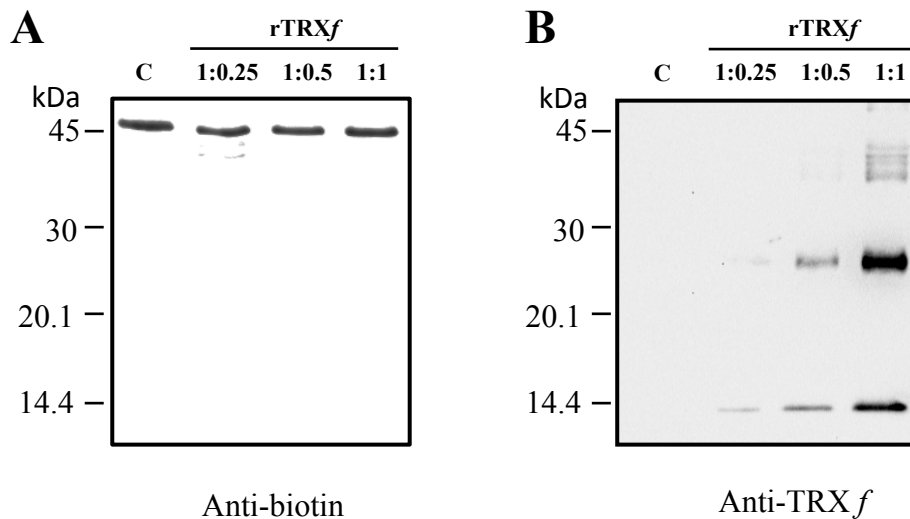

**Denitrosylation assay of GSNO-treated FBPase C173S C178S by TRX *f*.** A, Western blotting by using anti-biotin antibodies showing *S*-nitrosylated pattern. B, Western blotting with anti-TRX *f* antibodies. 17.25  $\mu$ g of *S*-nitrosylated mutant FBPase (see legend of figure 1 for experimental conditions) were incubated in a volume of 20  $\mu$ l with different FBPase:TRX *f* molar ratios for 30 min at room temperature in a buffer containing 100 mM Tris-HCl (pH 8.0). After incubation, biotin switch was carried out (see experimental details in the materials and methods section). A negative control without TRX *f* was included (C). Before cFBP1-TRX *f* incubations, TRX *f* was reduced with 50 mM DTT in 100 mM Tris-HCl (pH 8.0) by incubating for 30 min at room temperature and excess DTT was removed by gel filtration (see materials and methods section). Anti-biotin and anti-TRX *f* signals were not coincident.
