# Supplementary material for: Regulation by S-nitrosylation of the Calvin-Benson cycle fructose-1,6-bisphosphatase in Pisum sativum
Source: PubMed Central journal article supplement — Redox Biol. 2017 Oct 12;14:409–16. doi: 10.1016/j.redox.2017.10.008 (PMC5651545; doi:10.1016/j.redox.2017.10.008), 2017-10-12
Supplement: mmc5.pdf [file mmc5.pdf]

### Supplementary Table I. Primer list

| Name        |             | Sequence                                                    |
|-------------|-------------|-------------------------------------------------------------|
| cFBP1-NdeI  | cloning     | GGGG <u>CATATG</u> GCTGTGAAGGAAGCAACTAGTGAGAC<br>NdeI       |
| cFBP1-BamHI | cloning     | GGGG <u>GGATCCT</u> TAAAGCTAAGTACTTTTCAACCTTCTCCAC<br>BamHI |
| C153S-F     | mutagenesis | AGCCCCAATGACGAGAG <u>AGT</u> CCTTCCTGATTTTG<br>Ser153       |
| C153S-R     | mutagenesis | CAAATCAGGAAG <u>ACT</u> CTCGTCATTGGGGCT                     |
| C173S-F     | mutagenesis | CACAGAAGAACAAAGG <u>AGC</u> ATTGTGAATGTG<br>Ser173          |
| C173S-R     | mutagenesis | CACATTCACAAT <u>GCT</u> CCCTTTGTTCTTCTGTG                   |
| C178S-F     | mutagenesis | TGCATTGTGAATGTG <u>AGT</u> CAACCAGGAAGCA<br>Ser178          |
| C178S-R     | mutagenesis | TGCTTCCTGGTT <u>ACT</u> CACATTCACAATGCA                     |
